# Supplementary material for: Functions of Danggui Buxue Tang, a Chinese Herbal Decoction Containing Astragali Radix and Angelicae Sinensis Radix, in Uterus and Liver are Both Estrogen Receptor-Dependent and -Independent
Source: PubMed Central journal article supplement (PMC4156991; doi:10.1155/2014/438531), 2014-08-19
Supplement: 438531.f1.pdf [file 438531.f1.pdf]

Supplementary Table 1

## Primers used for real-time PCR quantification

| Genes                                                      | Primer Sequences                                | Amplicon size (bp) |
|------------------------------------------------------------|-------------------------------------------------|--------------------|
| Proliferation-related Ki-67 antigen (Ki-67)                | Forward 5' AAC CAG GAC TTT GTG CTC TGT AA 3'    | 209                |
|                                                            | Reverse 5' CTC TTT TGG CTT CCA TTT CTT C 3'     |                    |
| Estrogen receptor (ER) $\alpha$                            | Forward 5' GGA AGC ACA AGC GTC AGA GAG AT 3'    | 383                |
|                                                            | Reverse 5' AGA CCA GAC CAA TCA TCA GGA T 3'     |                    |
| Estrogen receptor (ER) $\beta$                             | Forward 5' CTA CAG AGA TGG TCA AAA GTG GAA 3'   | 216                |
|                                                            | Reverse 5' GGG CAA GGA GAC AGA AAG TAA GT 3'    |                    |
| Complement C3 (C3)                                         | Forward 5' ACA GCC TTC CCG GGA GCA TCA ACA 3'   | 276                |
|                                                            | Reverse 5' AGC GCA CCA CAG GAG GCA CAG AGT C 3' |                    |
| Clusterin (Clu)                                            | Forward 5' CCC TCC AGT CCA AGA TGC TCA ACA C 3' | 303                |
|                                                            | Reverse 5' CCA TGC GGC TTT TCC TGC GGT ATT C 3' |                    |
| Calbindin (CaBP9k)                                         | Forward 5' TGT CTG ACT CTG GCA CTC ACT G 3'     | 181                |
|                                                            | Reverse 5' CCT TCA GGA GGC TGG GGA ACT CTG 3'   |                    |
| Insulin-like growth factor binding protein I (IGFBP1)      | Forward 5' CAA CAG AAA GCA GGA GAT GAG A 3'     | 283                |
|                                                            | Reverse 5' GAA GAA GGA GGG AGG AAA CAA C 3'     |                    |
| Peroxisome proliferator-activated receptor (PPAR) $\alpha$ | Forward 5' CTC TGG CCA AGA GAA TCC AC 3'        | 211                |
|                                                            | Reverse 5' CAG TGG AAG AAT CGG ACC TC 3'        |                    |
| PPAR $\gamma$                                              | Forward 5' CAT TTC TGC TCC ACA CTA TGA A 3'     | 550                |
|                                                            | Reverse 5' CGG GAA GGA CTT TAT GTA TGA G 3'     |                    |
| PPAR $\delta$                                              | Forward 5' TCC AGA AGA AGA ACC GCA AC 3'        | 206                |
|                                                            | Reverse 5' GGC ATT GTA GAT GTG CTT GG 3'        |                    |
| Apolipoprotein A-I (Apo-A1)                                | Forward 5' CTG TGT ATG TGG ATG CAG TCA AG 3'    | 221                |
|                                                            | Reverse 5' GGT CCT TGT TCA TCT CGT TTC T 3'     |                    |
| Aryl hydrocarbon receptor (AHR)                            | Forward 5' CAA CCA AAC CAA ACA ACA GAG A 3'     | 196                |
|                                                            | Reverse 5' ATC CAT CAT CTT TCA ACC CAT C 3'     |                    |
| Aryl hydrocarbon receptor nuclear translocator (ARNT) 1    | Forward 5' ACT GCT GCC TAC CCT ACT CTT C 3'     | 191                |
|                                                            | Reverse 5' GCT ACT TGG TTG TGC TGA TGT T 3'     |                    |
| (ARNT) 2                                                   | Forward 5' TGA AAG AAG GAG AAG CCC AAT A 3'     | 200                |
|                                                            | Reverse 5' CAT CAG AGT TAT GCC GAG ACA G 3'     |                    |
| Cytochrome P450 (family 1) A1 (Cyp1A1)                     | Forward 5' TTA TGA CCA CGA TGA CCA AGA G 3'     | 210                |
|                                                            | Reverse 5' GCC CTT CTA AAA TGT CCT GTA G 3'     |                    |
| Glutathione-S-transferases Ya (GST-Ya)                     | Forward 5' GCC AGC CTT CTG ACC TCT TT 3'        | 161                |
|                                                            | Reverse 5' GCT CCG CTA AAA CTT GAA AAT C 3'     |                    |
| Cytochrome C oxidase I (COX1)                              | Forward 5' TGA GCA GGA ATA GTA GGG ACA GC 3'    | 261                |
|                                                            | Reverse 5' GAG TAG AAA TGA TGG AGG AAG CA 3'    |                    |
